# Supplementary material
Source: PubMed Central journal article supplement (PMC9903206)
Supplement: NIHMS1869185-supplement-Supplementary_Figures.pdf [file NIHMS1869185-supplement-Supplementary_Figures.pdf]

# Project>> Neuromuscular Cohort>> Family: FAM\_100

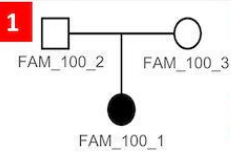

**2** Family Description: [✎](#)  
Isolated case of a female with LGMD

Analysis Status: [✎](#)  
**3** ■ Solved, known gene for phenotype

Assigned Analyst [✎](#) Broad Analyst  
Analysed By [+](#) analyst@broadinstitute.org on 08/23/2021

Case Notes [Add Note +](#) Sanger confirmed, proceed to reporting.  
Analysis Notes [Add Note +](#) Completed standard de novo/dominant and recessive searches  
Matchmaker Notes [Add Note +](#) Not submitted  
Coded Phenotype: [✎](#)  
limb-girdle muscular dystrophy

Post-discovery OMIM # [✎](#)  
253600

Age: [✎](#)  
24

Age of Onset: [✎](#)  
Childhood onset

Individual Notes [✎](#)

Consanguinity: [✎](#)

Other Affected Relatives: [✎](#)

Expected Mode of Inheritance: [✎](#)  
Autosomal dominant inheritance, Autosomal recessive inheritance

Assisted Reproduction: [✎](#)

Maternal Ancestry: [✎](#) French

Paternal Ancestry: [✎](#) Italian

Imputed Population:  
European (non-Finnish)

SV QC Flags:  
Raw Calls: >100

Features: [✎](#) Present  
Limbs: Limb-girdle muscular dystrophy

Pre-discovery OMIM disorders: [✎](#)  
253600

Previously Tested Genes: [✎](#)  
(None)

Candidate Genes: [✎](#) Genes associated with LGMD

**FAM\_100\_1**  
Added 11/05/2020

**FAM\_100\_2**  
Added 11/05/2020

**FAM\_100\_3**  
Added 11/05/2020

**5**

Age: [✎](#)  
65

Individual Notes [✎](#)

Maternal Ancestry: [✎](#) Italian

Paternal Ancestry: [✎](#) Italian

Imputed Population:  
European (non-Finnish)

Features: [✎](#) Unaffected

**6**

Age: [✎](#)  
60

Individual Notes [✎](#)

Maternal Ancestry: [✎](#) French

Paternal Ancestry: [✎](#) French

Imputed Population:  
European (non-Finnish)

Features: [✎](#) Unaffected

**7**  [Q](#)

[Variant Search](#)

[Add Manual Variant +](#)

[Add Manual SV +](#)

[MatchMaker Exchange](#)

**8**

- WES - SV LOADED 5/26/2021
- WES LOADED 5/7/2020
- WES LOADED 10/23/2017

- WES LOADED 5/26/2021
- WES - SV LOADED 5/25/2021
- WES LOADED 12/15/2020

- WES LOADED 5/26/2021
- WES - SV LOADED 5/25/2021
- WES LOADED 12/15/2020

**Supplementary Figure S1:** The *seqr* Family Page displaying FAM\_100 as an example. (1) Family pedigree; (2) general description of the case; (3) analysis and case details entered by the analysis team; (4-6) individual level details including age, ancestry, sample QC information, clinical information using HPO terms; (7) variant search link to begin analysis and an overview of tagged variants on the hover over of the saved variants box, if the case was previously analyzed; (8) type and date of data loaded into *seqr*.

The screenshot displays the *seqr* Family Page for Family MANT020. At the top, there are navigation options for 'Review' and 'Excluded' variants, along with a 'Notes' section. The main content is divided into several panels:

- Panel 1 (Left):** Shows the family pedigree and a search for CAPN3 variants. Two variants are listed: 'Muscular dystrophy, limb-girdle, autosomal recessive 1 (Autosomal recessive)' and 'Muscular dystrophy, limb-girdle, autosomal dominant 4 (Autosomal dominant)'. A red box labeled '1' highlights the search results.
- Panel 2 (Middle):** Displays the clinical variant details for a missense variant in FAM\_100\_1. The variant is classified as 'Pathogenic/Likely Pathogenic'. It includes HGVS coordinates (c.245C>T, p.Pro82Leu) and various scores (Cadd 25, Revel 0.69, Primate AI 0.59, Mpc 0.36, Splice AI 0.00030, Eigen 9.9). A red box labeled '2' highlights the variant details.
- Panel 3 (Bottom):** Shows the IGV (Integrative Genomics Viewer) view of the raw read data for the deletion. The deletion is in the CAPN3 gene, with coordinates 15:42384386-42394439. A red box labeled '3' highlights the IGV view.

**Supplementary Figure S2:** Variant filtration of SNVs/indels and SVs in tandem. In this example, a recessive restrictive search identified (1) a missense variant and (2) deletion in *CAPN3*. Variants in the raw read data can be viewed using (3) IGV within *seqr*. Both variants were externally validated and reported as the diagnosis for this research participant with limb-girdle muscular dystrophy.



## FAM\_008

**1** Submitted Genotypes: *GNAI1*  
7:80212805 G>C (hg38)

Submitted Phenotypes: Cerebral visual impairment (HP:0100704) • Generalized hypotonia (HP:0001290) • Global developmental delay (HP:0001263)  
• Infantile spasms (HP:0012469) • Seizure (HP:0001250)

[Search for New Matches](#) | [Update Submission](#) | [Delete Submission](#)

| <b>2</b> Match | First Seen ▾ | Contact                          | Genes        | Phenotypes              | Follow Up Status                                                     | Download Table |
|----------------|--------------|----------------------------------|--------------|-------------------------|----------------------------------------------------------------------|----------------|
| 0214           | 5/18/2021    | Ally Grater, Swampsea University | <i>GNAI1</i> | DD, ID, seizures        | <b>We Contacted Host</b><br><b>3</b> Contact Host                    |                |
|                |              | Contact Notes                    |              |                         |                                                                      |                |
| 7802           | 11/18/2019   | G. Mendel, St. Thomas Labs       | <i>GNAI1</i> | congenital contractures | <b>We Contacted Host</b><br><b>Deemed Irrelevant</b><br>Contact Host |                |
|                |              | Contact Notes                    |              |                         |                                                                      |                |

### **4** Send Contact Email for FAM\_008 ✕

Send To:

Subject:

Dear Dr. Mendel,

We recently matched with one of your patients in Matchmaker Exchange harboring variants in *GNAI1*. Our patient has a de novo missense variant 7:80212805 G>C (hg38) (c.810G>C/p.Lys270Asn), and presents with cerebral visual impairment, generalized hypotonia, global developmental delay and seizures. Would you be willing to share whether your patient's phenotype and genotype match with ours? We are very grateful for your help and look forward to hearing more.

Best wishes,

Analyst  
Broad Institute

Cancel

Send

**Supplementary Figure S4:** The Matchmaker Exchange node in *seqr*. (1) To make a submission, users select the variant and HPO terms listed in *seqr*; (2) MME matches are listed below with the host's contact details, gene ID, and phenotype, if included in the submission; (3) Automated email feature to communicate with hosts and track the status of matches within *seqr*; (4) sample contact email with variant and phenotype information.

## TRAPPC4

Decipher | seqr | Gene Search

**OMIM** Neurodevelopmental disorder with epilepsy, spasticity, and brain atrophy (*Autosomal recessive*)

splice region variant  
HGVS.C c.454+3A>G

**11:119020256** A > G  
hg19: 11:118890966

seqr | google | pubmed

- Cadd **22**
- Splice AI **0.55**
- Eigen **4.8**

This Callset **0.00080** **AC=25** out of 31448  
1kg WGS **0.0010**  
ExAC **0.00027** Hom=0  
gnomAD v2 exomes **0.00019** Hom=0  
gnomAD v3 genomes **0.000198** Hom=0  
TopMed **0.000231** Hom=0

● FAM\_009\_3

☰ SHOW READS

G/G

99, 1.0

**Supplementary Figure S5:** Allele count for a splice region variant in the gene *TRAPPC4* showing 25 alleles in the CMG callset. A review of the variants revealed three other cases with similar phenotypes that were homozygous for this variant across distinct projects and research groups.
